# Supplementary material for: Informing the development of a personalized mixed digital/in person multidisciplinary intervention to help breast cancer patients return to work: a qualitative study
Source: Research Square preprint supplement (doi:10.21203/rs.3.rs-1346067/v1), 2022-03-21
Supplement: Supplementary file 1 [file a93d29ac4dac5590a39a53e6.docx]

**Supplementary Materials**

**Supplementary Material 1: Interview guide (patients)**

***Interview guide for patients***

**Health trajectory**

- Can you tell me what were the treatments you received?

**Long-term toxicities**

- Did you have some late effect of cancer treatments?
- Did it had an impact on your work?

**Sick leave / before going back at work**

- How went your sick leave? Did you keep in touch with you colleagues, your superiors, human resources? How long were you in sick leave?
- How did you envision your resumption of work? Did you felt ready/capable of going back at work?
  - Did you have expectation or fear about returning to work?
  - What kind of work time did you envision to do (or were you proposed)?
- Did you address the return to work topic with you oncologist or other health providers?
- Did you saw or speak with other professionals at the time of going back at work/when you had just started again?

**Return to work**

- How did the return to work go?
- Could you tell me how your pre-work visit with the occupational physician went?
- What did it mean for you to go back at work? Today, how important is your work in your life? And before?
- Did you ask for adjustments such as working time, work schedule, to not carry heavy loads? Was it feasible? Were those proposed to you?
- Do you consider your colleagues, your superiors and human resources were there to support you since you went back at work? Did you see people having different attitude from before towards you?
- Do you think sickness and treatments have/had an impact on your work performance?
- What do you think you need/would have needed to be able to go back at work? What would have helped? What information did you lack of? Where did you find pertinent information?

**Interventions**

- Do you know of existing programs/interventions to help return to work? Did you use one of them?
- What do you think of the implementation of intervention/programs to promote return to work?
- What could facilitate the implementation of interventions/programs to help return to work? What elements would make you go towards it?
- What kind of intervention/programs would you like or prefer? Face to face, with provider(s), with a group, one on one, internet/smartphone based, mixed, other?
- If we developed an application that could help you manage your symptoms and help return to work, would you like this kind of tool?

Before we conclude, I would like to ask you a few more questions:

- Could you give me a timeline for your treatments and return to work?
- Could you tell me more about your job (type of employment structure, size), type of job you are doing (manual or no, responsibilities, standing/sitting), number of hours worked per week, part or full time job, type of contract (open ended, fixed-term, temporary), travel time to go to work and means of transport)?
- Did you have another pathology before your breast cancer diagnosis? Did it affect your work-life?
- How old are you?
- What is your marital status? Do you have children?
- Where do you live (village, small town, big town)?
- Did your sick leave have a financial impact on your life?

Do you have something to add? Do you want to speak more about one topic?

Thank interviewee and inform about next steps.

**Supplementary Material 2 : Interview guide (providers)**

***Interview guide for providers***

Could you speak to me about your clinical practice? (number of patients per week, number of breast cancer patients, consultations’ duration)

**Return to work**

- Do you address the return to work topic with your breast cancer patients?

If yes

- - How? (for example, how did it go las time)
  - And patients, they speak about it? Often? What kind of patients ask questions?
  - When in the care pathway are you addressing the return to work topic?

If no: Why?

- Do you think return to work is a topic that should systematically be addressed in consultation (by you)? Otherwise by whom?
- Regarding return to work, do you refer patients? To whom?

**Interventions**

- Is there interventions/programs to help patients return to work/deal with sequela in your institution? Could you explain how it goes?
- Did you have some feedback about those interventions/programs? What do patients think about them? What are the difficulties emerging?
- Who are the providers participating?
- [If no interventions] What are the barriers to the implementation of such interventions/programs in your institution?
- What kind of interventions/programs would you like to be implemented (both inside your institution or elsewhere and which could be helpful and appreciated by patients)?
- If an intervention leaning on an application or a website was implemented and supported by UNICANCER or Inserm, would you recommend it? Would you have time to present and propose it to patients?
- How do you think we could assure a good dissemination of information about this tool among breast cancer patients? How could you assure it?

Before we conclude, I would like to ask you a few more questions:

- How old are you?
- Since when are you practicing this job? Since when are you practicing here? Did you work elsewhere before? Was it different? How?

Do you have something to add? Do you want to speak more about one topic?

Thank interviewee and inform about next steps.
